# Supplementary material
Source: PubMed Central journal article supplement (PMC4618256)

## Supplementary Information

# Phosphorylation of the Nuclear Receptor Co-repressor 1 by Protein Kinase B (PKB/Akt) Switches its Co-repressor Targets in the Liver

Young Suk Jo<sup>1,2,5</sup>, Dongryeol Ryu<sup>1,5</sup>, Adriano Maida<sup>1,6</sup>, Xu Wang<sup>1</sup>,  
Ronald M. Evans<sup>4</sup>, Kristina Schoonjans<sup>5</sup>, Johan Auwerx<sup>1\*</sup>

<sup>1</sup> *Laboratory of Integrative and Systems Physiology, Institute of Bioengineering, École Polytechnique Fédérale de Lausanne, 1015 Lausanne, Switzerland.*

<sup>2</sup> *Division of Endocrinology, Department of Internal Medicine, Yonsei University College of Medicine, 50 Yonsei-ro Seodaemun-gu, Seoul, 120-752, South Korea.*

<sup>3</sup> *Gene Expression Laboratory, Howard Hughes Medical Institute, The Salk Institute for Biological Studies, La Jolla, CA 92037, USA.*

<sup>4</sup> *Metabolic Signaling, Institute of Bioengineering, École Polytechnique Fédérale de Lausanne, 1015 Lausanne, Switzerland.*

<sup>5</sup>These authors contributed equally to this work.

<sup>6</sup>Current address: Joint Division of Molecular Metabolic Control, DKFZ-ZMBH Alliance, German Cancer Research Center Heidelberg, 69120 Heidelberg, Germany

\*Correspondence: [admin.auwerx@epfl.ch](mailto:admin.auwerx@epfl.ch) (J.A.)

### **This file includes:**

Supporting Experimental Procedures

Supporting Table 1

Supporting Figure 1-4

## Supporting Experimental Procedures

**Animal Procedures and Biochemical Measurements.** All mice were maintained in a temperature-controlled (23°C) facility with a 12-hr light/dark cycle and were given free access to food and water. Regular chow diet was obtained from UAR (Villemoison sur Orge, France). Mice were fed *ad libitum*, fasted 4-hr or 24-hr before harvesting blood for subsequent measurements, and tissues for RNA isolation, lipid measurements and histology. The tail vein injections were performed as described previously. Briefly, *NCoR1<sup>hep/-</sup>* mice were injected 10 µg plasmid DNA in 200 µL of transfection mixture. After 6 hr, the mice were sacrificed and subjected to qRT-PCR. ipGTT was performed in animals that were fasted overnight. Glucose was administered by intraperitoneal injection at a dose of 2 g/kg BW. ITT was done in 4-hr fasted animals. Insulin was injected at a dose of 0.5 U/kg BW. Glucose quantification was done with the ACCU-CHEK® Aviva combo system (Roche Diagnostics, IN). Plasma insulin concentrations were measured using ELISA for mouse (Cristal Chem Inc., Downers Grove, IL). Biochemical analysis including triglycerides, free fatty acids, total cholesterol, LDL and HDL cholesterol were determined by enzymatic assays (Roche, Mannheim, Germany). EchoMRI-900 quantitative nuclear magnetic resonance (NMR) system (Echo Medical Systems, Houston, TX) was used for determination of lean mass and fat mass in conscious mice.

**Mass spectrometry analysis.** Gel lanes were cut into pieces and subjected to in-gel digestion with endoproteinase Glu-C or trypsin. For selective phosphopeptide

enrichment, TiO<sub>2</sub> Phosphopeptide Enrichment and Clean-up Kit (Thermo Fischer Scientific, Waltham, MA) was used. Enriched phosphopeptides were analyzed by nano-LC-MS/MS using an Orbitrap Elite mass spectrometer (Thermo Fischer Scientific) coupled to an ultraperformance LC (UPLC) system (Thermo Fischer Scientific Ultimate 3000 RSLC). Data analysis was performed with Proteome Discoverer (v. 1.3) and searches were performed with Mascot and Sequest against a mouse database (UniProt release 2013\_01). Data were further processed, inspected and visualized using Scaffold 3 software (Proteome Software, Inc., Portland, OR, USA).

**Generation of recombinant glutathione S-transferase (GST)–peptide fusion protein.** To generate plasmids expressing the 1<sup>st</sup> (1453-1466 AA) and 2<sup>nd</sup> (2401-2415 AA) peptides of NCoR1, sense (5'-GGG GAA TTC GAA GTG GTC CAG AGC ACG A-3') and antisense (5'-TGC GGC CGC TCA AGA CTT GCT GGA AGA AAC ATC AG-3') primer for the 1<sup>st</sup> peptide and sense (5'-GGG GAA TTC GAG GCA CGG AGA GAT GAA G-3') and antisense (5'-TGC GGC CGC TCA GTC GTC ACT ATC AGA CAG TGT C-3') primer for the 2<sup>nd</sup> peptide were used. PCR was performed using the standard PCR condition (PrimeSTAR® HS Polymerase Takara Bio, Japan). The PCR fragments corresponding to the 1<sup>st</sup> and 2<sup>nd</sup> peptides were individually cloned into pGEX-5X-1 (Amersham Biosciences, Amersham, UK). *E. coli* BL21 was transformed with the recombinant constructs by heat shock and the expression of fusion proteins was induced with 1 mM IPTG at 37 °C for 3-hr. Cells were harvested by centrifugation, resuspended in 15 ml of phosphate buffered saline (PBS) including protease inhibitors cocktail (Roche) and disrupted by high

pressure (3000 psi) with a French Press (Spectronics Instruments, Rochester, NY, USA). Cell debris was removed by centrifugation at 10,000×g for 15 min at 4 °C. The supernatants were injected into a 1 ml GSTrap column (Amersham Biosciences). Bound protein was eluted with 50 mM Tris–HCl, 10 mM reduced glutathione, pH 8.0. Purified GST-1<sup>st</sup> and GST-2<sup>nd</sup> peptides were analyzed by 12% SDS-PAGE under reducing conditions with 0.1% Coomassie blue R250.

**Plasmids and site-directed mutagenesis.** The plasmids used in this study were generated using a human liver cDNA library (Invitrogen). To generate plasmids expressing HA-hLXR $\alpha$ , HA-hPPAR $\alpha$  and HA-hERR $\alpha$ , the PCR products were amplified using primer sets flanking the entire coding region of each gene (LXR $\alpha$ -F-EcoRV: 5'-GGG GAT ATC CCA TGT CCT TGT GGC TGG GG-3'; LXR $\alpha$ -R-XhoI: 5'-TTT CTC GAG TCA TTC GTG CAC ATC CCA-3'; PPAR $\alpha$ -F-NotI: 5'-GGG GCG GCC GCC CAT GGT GGA CAC GGA AAG C-3'; PPAR $\alpha$ -R-ApaI: 5'-CCC GGG CCC TCA GTA CAT GTC CCT GTA GAT CTC C-3'; ERR $\alpha$ -F-EcoRI: 5'-GGG GAA TTC ATG TCC AGC CAG GTG GTG-3'; ERR $\alpha$ -R-XbaI: 5'-TCT AGA TCA GTC CAT CAT GGC CTC-3'). Each amplified PCR product was digested and ligated into pcDNA3-HA plasmid. pCMX-FLAG-mNCoR1 was generated as described. The site-directed mutagenesis in pCMX-FLAG-mNCoR1 vector to generate pCMX-FLAG-S1460E mNCoR1, pCMX-FLAG-S1460A mNCoR1 was performed according to the Stratagene QuikChange site-directed mutagenesis kit (Stratagene, La Jolla, CA) protocol by using the following primers: S1460E primers 5'-CGA GCC CGG CAC ACG GAA GTG GTG AGC TCT GG-3' and 5'-CCA GAG CTC ACC ACT TCC GTG TGC CGG GCT CG-3'; S1460A primers 5'-CGA GCC CGG CAC ACG GCA GTG

GTG AGC TCT G-3' and 5'- CAG AGC TCA CCA CTG CCG TGT GCC GGG CTC G-3'.

**Western Blot Analysis.** Western blot analysis was performed according to standard methods with commercially available antibodies: Phospho-(Ser/Thr) Akt Substrate Antibody (Cell Signaling, #9611), Monoclonal anti-FLAG<sup>®</sup> M2-Peroxidase (HRP) (Sigma-Aldrich, A8952), anti-HA-Tag (6E2) mouse mAb (HRP Conjugate) (Cell Signaling, #2999), Mitoprofile Total OXPHOS Rodent WB Antibody Cocktail (Mitosciences/Abcam, Cambridge, MA, ab110413), anti-OxPhos Complex II 30 kDa subunit, mouse IgG2a, monoclonal 21A11 (Molecular Probes<sup>™</sup>, Eugene, Oregon, A21345), Anti-Nuclear Receptor Corepressor NCoR antibody (ChIP Grade, Abcam, ab24552), anti-NCoR1 antibody (Cell signaling, #5948) and anti- $\beta$ -Actin Antibody (Cell Signaling, #4967).

**Supporting Table 1.** List of primer sets used for qRT-PCR.

| Gene     | Forward Primer           | Reverse Primer             |
|----------|--------------------------|----------------------------|
| 36B4     | AGATTCGGGATATGCTGTTGG    | AAAGCCTGGAAGAAGGAGGTC      |
| Srebp1c  | GGCACTAAGTGCCCTCAACCT    | GCCACATAGATCTCTGCCAGTGT    |
| Me1      | GATGATAAGGTCTTCCTCACC    | TTACTGGTTGACTTTGGTCTGT     |
| Cpt1a    | CTCCGCCTGAGCCATGAAG      | CACCAGTGATGATGCCATTCT      |
| mCad     | CAACACTCGAAAGCGG         | GCTGTTCCGTCAACTCAAACTA     |
| Sdhb     | GGACCTATGGTGTGGATGC      | GTGTGCACGCCAGAGTATTG       |
| Esrra    | ACTGCCACTGCAGGATGAG      | CACAGCCTCAGCATCTTCAA       |
| Pygl     | AAGGGTTTTCCATGCCTGAG     | CTATGGCTACGGCATTCTGT       |
| G6pdx    | GCCACCAGATGGTAGGATAGA    | GTTGTACCAGGGTGATGCCT       |
| Scd1     | CCGGAGACCCCTTAGATCGA     | TAGCCTGTAAAAGATTTCTGCAAACC |
| Elovl3   | CCGCGTTCTCATGTAGGTCT     | CTTAAGGCCCTTTTTGGAGG       |
| Elovl5   | CTGAGTGACGCATCGAAATG     | CTTGACATCCTCCTGCTC         |
| Elovl6   | AACTTGCTCGCTTGTTTCAT     | CCAATGGATGCAGGAAAAC        |
| Gpam     | CAACACCATCCCCGACATC      | GTGACCTTCGATTATGCGATCA     |
| Acss2    | GCTGAACTGACACACCTGGA     | AACTTGCGACAAAGTTGCT        |
| Acss3    | TCAATGTGCCGATCAATAGC     | TACAAGCCCTGGACCAAAAC       |
| Fasn     | AGCTTCGGCTGCTGTTGGAAGT   | TCGGATGCCTCTGAACCACTCACA   |
| Plin2    | CAATTTGTGGCTCCAGCTTC     | CCCGTATTTGAGATCCGTGT       |
| Fitm1    | GTAGCCAGGAACACCACCAG     | CTAGCCACGGCAACTTCTTC       |
| Cidec    | ATTGTGCCATCTTCCTCCAG     | ATCATGGCTCACAGCTTGG        |
| Ndufb3   | TACCACAAACGCAGCAAACC     | AAGGGACGCCATTAGAAACG       |
| Ndufb5   | CTTCGAACTTCCTGCTCCTT     | GGCCCTGAAAAGAACTACG        |
| Cyts     | TCCATCAGGGTATCCTCTCC     | GGAGGCAAGCATAAGACTGG       |
| Cox5a    | GAGCCCAAAATCATTGATGC     | TGAGGTCCTGCTTTGCTCTT       |
| Atp5g1   | GCTGCTTGAGAGATGGGTTCT    | AGTTGGTGTGGCTGGATCA        |
| Ncor1    | CTGGTCTTTCAGCCACCATT     | CCTTCATTGGATCCTCCATC       |
| Rpl32    | GGGAGCAACAAGAAAACCAA     | TTGTGAGCAATCTCAGCACA       |
| Srebp1a  | GGCCGAGATGTGCGAACT       | TTGTTGATGAGCTGGAGCATGT     |
| Srebp2   | GCGTTCTGGAGACCATGGA      | ACAAAGTTGCTCTGAAAACAAATCA  |
| G6pc     | CTGCAAGGGGAGAACTCAGCAA   | GAGGACCAAGGAAGCCACAAT      |
| Uqcrfs1  | ATGTGAAGCGACCCCTTCT      | GGAAAACGGACAGAAGCAG        |
| Acox1    | GCCCAACTGTGACTTCCATT     | GGCATGTAACCCGTAGCACT       |
| Ppara    | CCTGAACATCGAGTGTGCAATAT  | GGTTCTTCTTCTGAATCTTGCAGCT  |
| Pparb/d  | CTTTCATCGCGGCCATCATTCT   | TCTGCCATCTTCTGCAGCAGCTT    |
| Pparg    | ATGGGTGAAACTCTGGGAGATTCT | CTTGGAGCTTCAGGTCATATTTGTA  |
| Esrrb    | GGGAGCTTGTGTTCCCTCATC    | ATCTCCATCCAGGCACTCTG       |
| Esrrg    | GATGAGCCTCCTCCAGAGTG     | TGCACAGCTTCCACATCTTC       |
| Pgc1a    | AAGTGTGAACTCTCTGGAACCTG  | GGGTTATCTTGGTTGGCTTTATG    |
| Pepck    | CCACAGCTGCTGCAGAACA      | GAAGGGTCGCATGGCAA          |
| hSREBP1c | ACAGTGACTTCCCTGGCCTAT    | GCATGGACGGGTACATCTTCAA     |
| hME1     | GGGAGACCTTGGCTGTAATGG    | TTCGGTTCCCACATCCAGAAT      |

## Supporting Figure Legends

**Supporting Figure 1.** Motif scan graphic indicates Serine 1460 phosphorylation of mouse NCoR1 by Akt kinase with high stringency (<http://scansite.mit.edu/>).

**Supporting Figure 2. (A-C)** qRT-PCR analysis to evaluate mRNA levels of *Srebp1a*, *Me1*, *NCoR1* (**A**), *mCad*, *Esrra*, *Ndufb3* (**B**), *SREBP1c* and *ME1* (**C**) according to the sequence composition of NCoR1 phosphorylation site using indicated cell lines. HEK293T and Hep G2 were transfected with indicated plasmids (1 µg/well). (**D**) Co-immunoprecipitation assay using Flag-S1460E NCoR1 (SE) and HA-PPARα (1 µg/well per 6-well plate) in AML12 cells with or without Wy14643 (1 µM). (**E**) Western blot analysis to evaluate pS1460 NCoR1 and pAkt in primary hepatocytes from *NCoR1<sup>L2/L2</sup>* mice infected with either Ad-LacZ or Ad-Cre adenovirus grown in high glucose (25 mM) medium with or without a 10 min insulin treatment (100 nM). (**F**) qRT-PCR analysis to evaluate mRNA levels of *Me1*, *Elovl6*, *mCad* and *Ndufb5* according to the sequence composition of NCoR1 phosphorylation site in livers from 25 wk-old *NCoR1<sup>hep-/-</sup>* chow fed mice after naked DNA gene transfer through tail vein (n > 5/group). All data shown as mean ± SEM, \*  $p < 0.05$ , \*\*  $p < 0.01$ , \*\*\*  $p < 0.001$ .

**Supporting Figure 3.** Gene Set Enrichment Analysis using transcriptomes obtained using the GeneChip Gene 1.0 ST Array System (Affymetrix) in livers of 25 wk-old male *NCoR1<sup>hep-/-</sup>* chow fed mice (n=4/group). The gene set encompassing the

electron transport system (OxPhos) has nominal  $p < 0.001$  and FDR  $q = 0.035$ .

**Supporting Figure 4.** (A) Validation of anti-NCoR1 antibody in liver lysates from *NCoR1<sup>hep+/+</sup>* and *NCoR1<sup>hep-/-</sup>* male mice injected with insulin (0.5 U/kg) or PBS after 4-hr fasting. To detect total NCoR1, polyclonal goat antibody provided by Dr. Ronald M. Evans (indicated as Evans) and commercially available polyclonal rabbit antibodies (indicated as Cell Signaling and Abcam) were used. PARP-1 was used as a loading control. (B) Western blot analysis showing specificity of anti-pS1460 NCoR1 Ab. HEK293T cells were transfected with plasmid DNA expressing either Flag-mNCoR1 or Flag-S1460A mNCoR1 (1  $\mu$ g/well). After 48-hr, cells were exposed to 100 nM insulin for the indicated times. Subsequently, cell lysates were analyzed by immunoblotting for the levels and NCoR1 phosphorylation with an anti-pS1460 NCoR1 Ab.



## Motif Scan Graphic Results: [NCOR1](#)

Description: User-entered sequence

Motifs scanned: Akt\_Kin

Stringency: High

Show domains: No

Baso\_ST\_kin  
51460

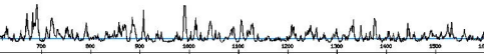

Basophilic serine/threonine kinase group (Baso\_ST\_kin)

Akt Kinase

Gene Card [AKT1](#)

| Site  | Score                  | Percentile | Sequence                       | SA    |
|-------|------------------------|------------|--------------------------------|-------|
| 51460 | <a href="#">0.4838</a> | 0.134 %    | <a href="#">PVRRRHTSWSSGSP</a> | 0.445 |

[Repeat Scan at Medium Stringency](#)

[Repeat Scan at Low Stringency](#)

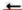

[Scan Another Protein](#)

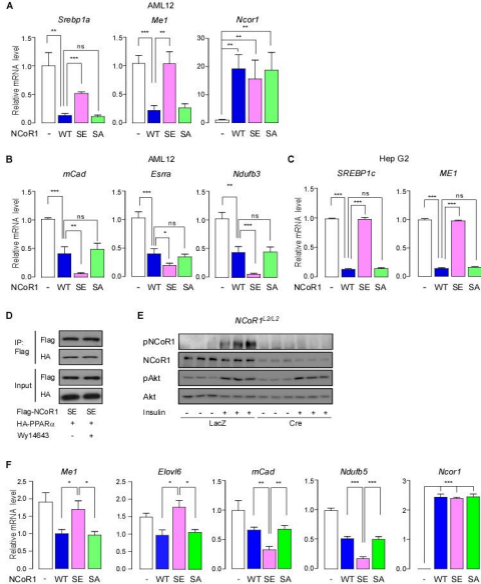

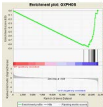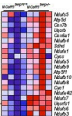

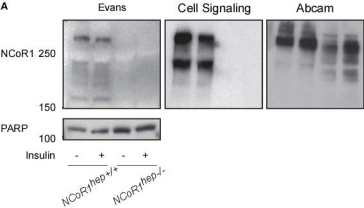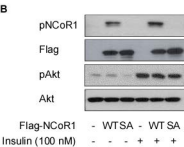

Supplement: NIHMS694469-supplement-Supp_MaterialS1.pdf [file NIHMS694469-supplement-Supp_MaterialS1.pdf]
